# Supplementary material for: Candidate gene based association mapping in Fusarium culmorum for field quantitative pathogenicity and mycotoxin production in wheat
Source: PubMed Central journal article supplement (PMC5438566; doi:10.1186/s12863-017-0511-9), 2017-05-19

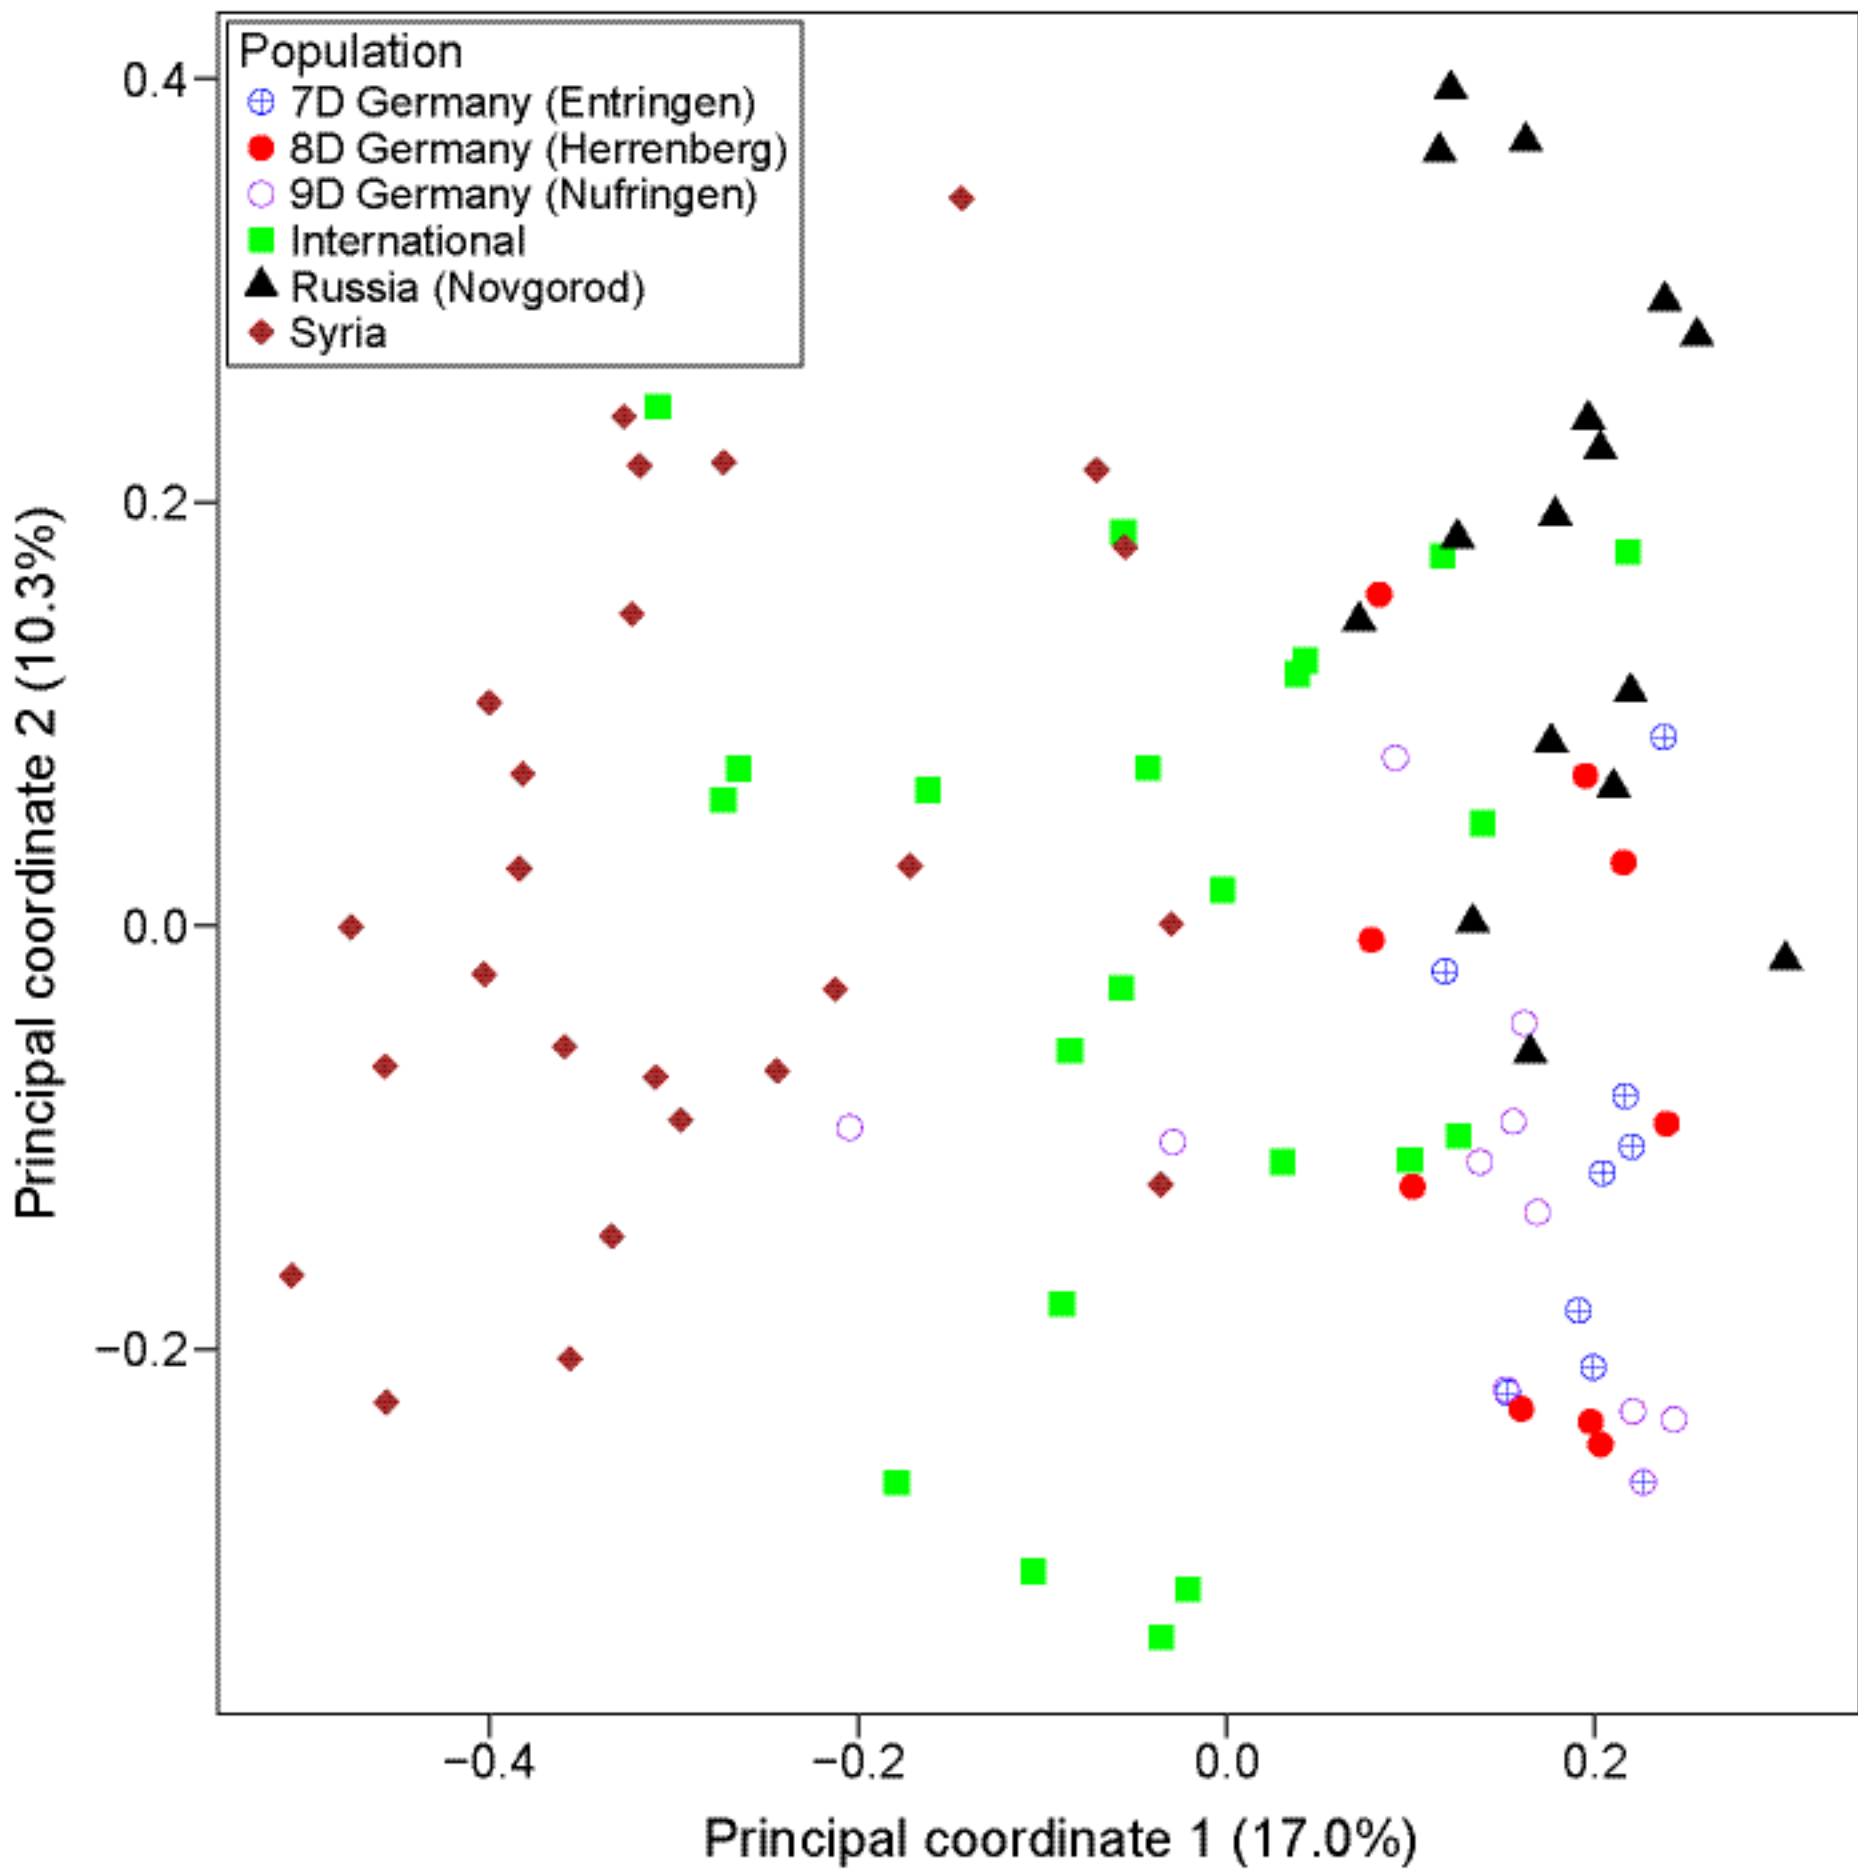

Supplement: 12863_2017_511_MOESM6_ESM.pdf [file 12863_2017_511_MOESM6_ESM.pdf]
